# Supplementary material
Source: ML conference proceedings conference paper supplement (https://openaccess.thecvf.com/content/CVPR2021/html/Xu_Adaptive_Rank_Estimate_CVPR_2021_paper.html)
Supplement: Supplementary file 2 [file supplementary material - Proof.pdf › supplementary material/supplementary material - Proof.pdf]

# Supplementary Material to “Adaptive Rank Estimate in Robust Principal Component Analysis”

In this document, we give the proofs of one lemma and two theorems used in the main paper.

## 1. Proof of Lemma 1

**Lemma 1** If  $\mathbf{C}, \mathbf{D} \in \mathbb{R}^{m \times n}$  satisfy  $\mathbf{C}^T \mathbf{D} = 0$ , we have

$$\begin{aligned}\|\mathbf{C} + \mathbf{D}\|_W &\geq \|\mathbf{C}\|_W \\ \|\mathbf{C} + \mathbf{D}\|_F &\geq \|\mathbf{C}\|_F\end{aligned}$$

*Proof.*

Let  $\lambda_k(\mathbf{X})$  and  $\sigma_k(\mathbf{X})$  denote the  $k$ th eigenvalue and singular value of matrix  $\mathbf{X} \in \mathbb{R}^{m \times n}$ , respectively, and  $\mathbb{S}$  is the subspace of  $\mathbb{R}^n$ . Based on the Courant-Fischer MaxMin Theorem, we can obtain that

$$\begin{aligned}\lambda_k(\mathbf{C}^T \mathbf{C} + \mathbf{D}^T \mathbf{D}) &= \max_{\dim(\mathbb{S})=k} \min_{\substack{\mathbf{Y} \neq 0 \\ \mathbf{Y} \in \mathbb{S}}} \frac{(\mathbf{Y}^T \mathbf{C}^T \mathbf{C} \mathbf{Y} + \mathbf{Y}^T \mathbf{D}^T \mathbf{D} \mathbf{Y})}{\mathbf{Y}^T \mathbf{Y}} \\ &= \max_{\dim(\mathbb{S})=k} \min_{\substack{\mathbf{Y} \neq 0 \\ \mathbf{Y} \in \mathbb{S}}} \frac{\mathbf{Y}^T (\mathbf{C}^T \mathbf{C} + \mathbf{D}^T \mathbf{D} + \mathbf{D}^T \mathbf{C} + \mathbf{C}^T \mathbf{D}) \mathbf{Y}}{\mathbf{Y}^T \mathbf{Y}} \\ &= \max_{\dim(\mathbb{S})=k} \min_{\substack{\mathbf{Y} \neq 0 \\ \mathbf{Y} \in \mathbb{S}}} \frac{\mathbf{Y}^T (\mathbf{C} + \mathbf{D})^T (\mathbf{C} + \mathbf{D}) \mathbf{Y}}{\mathbf{Y}^T \mathbf{Y}} \\ &= \sigma_k^2(\mathbf{C} + \mathbf{D})\end{aligned}\tag{a.1}$$

$$\begin{aligned}\lambda_k(\mathbf{C}^T \mathbf{C}) &= \max_{\dim(\mathbb{S})=k} \min_{\substack{\mathbf{Y} \neq 0 \\ \mathbf{Y} \in \mathbb{S}}} \frac{(\mathbf{Y}^T \mathbf{C}^T \mathbf{C} \mathbf{Y})}{\mathbf{Y}^T \mathbf{Y}} \\ &= \sigma_k^2(\mathbf{C})\end{aligned}\tag{a.2}$$

Since  $\mathbf{Y}^T \mathbf{D}^T \mathbf{D} \mathbf{Y} \geq 0$ , we can obtain that

$$\frac{(\mathbf{Y}^T \mathbf{C}^T \mathbf{C} \mathbf{Y} + \mathbf{Y}^T \mathbf{D}^T \mathbf{D} \mathbf{Y})}{\mathbf{Y}^T \mathbf{Y}} \geq \frac{(\mathbf{Y}^T \mathbf{C}^T \mathbf{C} \mathbf{Y})}{\mathbf{Y}^T \mathbf{Y}}\tag{a.3}$$

$$\sigma_k^2(\mathbf{C} + \mathbf{D}) \geq \sigma_k^2(\mathbf{C})\tag{a.4}$$

$$|\sigma_k(\mathbf{C} + \mathbf{D})| \geq |\sigma_k(\mathbf{C})|\tag{a.5}$$

Based on the definition of  $\|\cdot\|_F$  and  $\|\cdot\|_W$ , we can obtain that

$$\|\mathbf{C} + \mathbf{D}\|_W = \sum_i |\omega_i \sigma_i(\mathbf{C} + \mathbf{D})| \geq \sum_i |\omega_i \sigma_i(\mathbf{C})| = \|\mathbf{C}\|_W\tag{a.6}$$

$$\|\mathbf{C} + \mathbf{D}\|_F^2 = \sum_i \sigma_i^2(\mathbf{C} + \mathbf{D}) \geq \sum_i \sigma_i^2(\mathbf{C}) = \|\mathbf{C}\|_F^2\tag{a.7}$$

## 2. Proof of Theorem 1

**Theorem 1** Given  $\mathbf{Q} \in \mathbb{R}^{m \times n}$  where  $\mathbf{Q} = \mathbf{U}_Q \mathbf{D}_Q \mathbf{V}_Q^T$ , the minimization problem

$$\arg \min_{\mathbf{P}} \frac{1}{2} \|\mathbf{P} - \mathbf{Q}\|_F^2 + \tau \|\mathbf{P}\|_W\tag{a.8}$$

has solution  $\hat{\mathbf{P}} = \mathbf{U}_Q \hat{\mathbf{\Sigma}}_P \mathbf{V}_Q^T$ , where  $\hat{\mathbf{\Sigma}}_P$  is the solution of the following optimization problem:

$$\hat{\mathbf{\Sigma}}_P = \arg \min_{\mathbf{\Sigma}_P} \frac{1}{2} \|\mathbf{\Sigma}_P - \mathbf{D}_Q\|_F^2 + \tau \|\mathbf{\Sigma}_P\|_W\tag{a.9}$$

*Proof.*

Define that  $\mathbf{U}_{Q^\perp}$  is the set of orthogonal based of the complementary space of  $\mathbf{U}_Q$ , the matrix  $\mathbf{P}$  can be expressed as  $\mathbf{P} = \mathbf{U}_Q \mathbf{B}_1 + \mathbf{U}_{Q^\perp} \mathbf{B}_2$ , where  $\mathbf{B}_1$  and  $\mathbf{B}_2$  are the components of  $\mathbf{P}$  in subspaces  $\mathbf{U}_{Q^\perp}$  and  $\mathbf{U}_Q$ , respectively. Then, we can get

$$\begin{aligned} f(\mathbf{P}) &= \frac{1}{2} \|\mathbf{P} - \mathbf{Q}\|_F^2 + \tau \|\mathbf{P}\|_W \\ &= \frac{1}{2} \|\mathbf{U}_Q \mathbf{B}_1 + \mathbf{U}_{Q^\perp} \mathbf{B}_2 - \mathbf{U}_Q \mathbf{D}_Q \mathbf{V}_Q^T\|_F^2 + \tau \|\mathbf{U}_Q \mathbf{B}_1 + \mathbf{U}_{Q^\perp} \mathbf{B}_2\|_W \end{aligned}$$

Based on Lemma 1, the function can be expressed as

$$f(\mathbf{P}) \geq \frac{1}{2} \|\mathbf{U}_Q \mathbf{B}_1 - \mathbf{U}_Q \mathbf{D}_Q \mathbf{V}_Q^T\|_F^2 + \tau \|\mathbf{U}_Q \mathbf{B}_1\|_W \quad (\text{a. 10})$$

Similarly, for  $\mathbf{V}_Q$  we can get

$$f(\mathbf{P}) \geq \frac{1}{2} \|\mathbf{U}_Q \mathbf{\Sigma}_P \mathbf{V}_Q^T - \mathbf{U}_Q \mathbf{D}_Q \mathbf{V}_Q^T\|_F^2 + \tau \|\mathbf{U}_Q \mathbf{\Sigma}_P \mathbf{V}_Q^T\|_W \quad (\text{a. 11})$$

Since  $\mathbf{U}_Q$  and  $\mathbf{V}_Q$  will be not change  $\|\cdot\|_F$  and  $\|\cdot\|_{W,*}$ , we can get

$$f(\mathbf{P}) \geq \frac{1}{2} \|\mathbf{\Sigma}_P - \mathbf{D}_Q\|_F^2 + \tau \|\mathbf{\Sigma}_P\|_W$$

Therefore, according to the solution of Eq. (a. 11), the solution of Eq. (a. 10) can be obtained by  $\hat{\mathbf{P}} = \mathbf{U}_Q \hat{\mathbf{\Sigma}}_P \mathbf{V}_Q^T$

### 3. Proof of Theorem 2

**Theorem 2** Given  $\tau > 0$ ,  $\mathbf{P}, \mathbf{Q} \in \mathbb{R}^{m \times n}$  where  $\mathbf{Q} = \mathbf{U}_Q \mathbf{D}_Q \mathbf{V}_Q^T$ ,  $\mathbf{D}_Q = \text{diag}(\delta_{Q_1}, \dots, \delta_{Q_r}, \delta_{Q(r+1)}, \dots, \delta_{Q_\ell})$  and  $\ell = \min(m, n)$ . We can define  $\mathbf{Q} = \mathbf{Q}_1 + \mathbf{Q}_2$ ,  $\mathbf{Q}_1 = \mathbf{U}_{Q_1} \mathbf{D}_{Q_1} \mathbf{V}_{Q_1}^T$  and  $\mathbf{Q}_2 = \mathbf{U}_{Q_2} \mathbf{D}_{Q_2} \mathbf{V}_{Q_2}^T$ , where  $\mathbf{D}_{Q_1} = \text{diag}(\delta_{Q_1}, \dots, \delta_{Q_r}, 0, \dots, 0)$ ,  $\mathbf{U}_{Q_1}$  and  $\mathbf{V}_{Q_1}$  are the singular vector matrices corresponding to the  $r$ th largest singular values,  $\mathbf{D}_{Q_2} = \text{diag}(0, \dots, 0, \delta_{Q(r+1)}, \dots, \delta_{Q_\ell})$ ,  $\mathbf{U}_{Q_2}$  and  $\mathbf{V}_{Q_2}$  corresponding to the singular values from  $(r+1)$ th to the last.  $\|\cdot\|_W$  is defined as Eq. (30) and Eq. (31). The optimal solution of the minimization problem  $\arg \min_{\mathbf{P}} \frac{1}{2} \|\mathbf{P} - \mathbf{Q}\|_F^2 + \tau \|\mathbf{P}\|_W$

can be expressed as

$$\mathbf{P}^* = \mathcal{D}_{\tau, W}[\mathbf{Q}] = \mathbf{U}_Q (\mathbf{D}_{Q_1} + S_\tau[\mathbf{D}_{Q_2}]) \mathbf{V}_Q^T = \mathbf{Q}_1 + \mathbf{U}_{Q_2} S_\tau[\mathbf{D}_{Q_2}] \mathbf{V}_{Q_2}^T$$

**Proof.**

Based on the Theorem 1, we can get the equivalent solution of the problem (40), namely  $\hat{\mathbf{P}} = \mathbf{U}_Q \hat{\mathbf{\Sigma}}_P \mathbf{V}_Q^T$  where  $\hat{\mathbf{\Sigma}}_P = \arg \min_{\mathbf{\Sigma}_P} \frac{1}{2} \|\mathbf{\Sigma}_P - \mathbf{D}_Q\|_F^2 + \tau \|\mathbf{\Sigma}_P\|_W$ , and  $\mathbf{\Sigma}_P = \text{diag}\{\sigma_1(\mathbf{P}), \dots, \sigma_\ell(\mathbf{P})\}$ . The minimize function of  $\hat{\mathbf{\Sigma}}_P$  can be expressed as

$$\mathcal{J}(\mathbf{\Sigma}_P) = \frac{1}{2} \sum_{i=1}^{\ell} (\sigma_i^2(\mathbf{Q}) - 2\sigma_i(\mathbf{P})\sigma_i(\mathbf{Q}) + \sigma_i^2(\mathbf{P})) + \tau \sum_{i=r+1}^{\ell} \sigma_i(\mathbf{P}) \quad (\text{a. 12})$$

$\sigma_i^2(\mathbf{Q})$  can be regarded as a constant and ignored. Therefore, the function can be expressed as

$$\begin{aligned} \mathcal{J}(\mathbf{\Sigma}_P) &= \frac{1}{2} \sum_{i=1}^{\ell} (-2\sigma_i(\mathbf{P})\sigma_i(\mathbf{Q}) + \sigma_i^2(\mathbf{P})) + \tau \sum_{i=r+1}^{\ell} \sigma_i(\mathbf{P}) \\ &= \frac{1}{2} \left( \sum_{i=1}^r (-2\sigma_i(\mathbf{P})\sigma_i(\mathbf{Q}) + \sigma_i^2(\mathbf{P})) + \sum_{i=r+1}^{\ell} (-2\sigma_i(\mathbf{P})\sigma_i(\mathbf{Q}) + \sigma_i^2(\mathbf{P}) + 2\tau\sigma_i(\mathbf{P})) \right) \quad (\text{a. 11}) \end{aligned}$$

Since each  $\sigma_i(\mathbf{P})$  is independent in Eq. (a.11) and it is easy to see that the minimum of  $\mathcal{J}(\mathbf{\Sigma}_P)$  is obtained at  $\hat{\mathbf{\Sigma}}_P = \text{diag}(\hat{\sigma}_1(\mathbf{P}), \dots, \hat{\sigma}_\ell(\mathbf{P}))$ , where  $\hat{\sigma}_i(\mathbf{P})$  is defined as

$$\hat{\sigma}_i(\mathbf{P}) = \begin{cases} \sigma_i(\mathbf{Q}) & \text{if } i < r + 1 \\ \max(\sigma_i(\mathbf{Q}) - \tau, 0) & \text{otherwise} \end{cases}. \quad (\text{a.12})$$

Hence, the solution of Eq. (42) is  $\hat{\mathbf{P}} = \mathbf{U}_Q \hat{\Sigma}_P \mathbf{V}_Q^T = \mathcal{D}_{\tau, W}[\mathbf{Q}] = \mathbf{Q}_1 + \mathbf{U}_{Q2} S_\tau[\mathbf{D}_{Q2}] \mathbf{V}_{Q2}^T$ .
